# Supplementary material for: Use of mobile technology by frontline health workers to promote reproductive, maternal, newborn and child health and nutrition: a cluster randomized controlled Trial in Bihar, India
Source: PubMed Central journal article supplement (PMC6875677; doi:10.7189/jogh.09.020424), 2019-12
Supplement: jogh-09-020424-s001.pdf [file jogh-09-020424-s001.pdf]

## SUPPLEMENTARY MATERIALS

**Supplementary Table 1: Number of subjects with data on each outcome.**

| Modeled outcome                                                                        | Baseline<br>(May-June<br>2012) |                   | Post-implemen-<br>tation<br>(July-August 2014) |                   |
|----------------------------------------------------------------------------------------|--------------------------------|-------------------|------------------------------------------------|-------------------|
|                                                                                        | Contr<br>ol                    | Inter-<br>vention | Control                                        | Inter-<br>vention |
| <b>Antenatal Care</b>                                                                  |                                |                   |                                                |                   |
| At least 3 antenatal home visits (%)                                                   | 790                            | 769               | 809                                            | 744               |
| 2 or more home visits in last trimester (%)                                            | 790                            | 768               | 809                                            | 744               |
| At least 2 tetanus toxoid injections (%)                                               | 790                            | 769               | 808                                            | 744               |
| Consumed at least 90 iron-folic acid tablets (%)                                       | 790                            | 769               | 809                                            | 744               |
| Received iron-folic acid tablets by month 4 (%)                                        | 790                            | 769               | 809                                            | 744               |
| <b>Home Visits After Delivery</b>                                                      |                                |                   |                                                |                   |
| Visit in first 24 Hours (%)                                                            | n.a.                           | n.a.              | 806                                            | 743               |
| In the home delivered subset: Visit in first 24 Hours (%)                              | n.a.                           | n.a.              | 152                                            | 111               |
| Any visit in the first week (%)                                                        | n.a.                           | n.a.              | 793                                            | 735               |
| Any visit after first week but before first month (%)                                  | n.a.                           | n.a.              | 795                                            | 737               |
| Total number of home visits in the first month (mean) (%)                              | n.a.                           | n.a.              | 809                                            | 744               |
| <b>Delivery and Newborn Care</b>                                                       |                                |                   |                                                |                   |
| Facility delivery (%)                                                                  | 789                            | 767               | 809                                            | 741               |
| Nothing applied to the umbilical cord (%)                                              | 790                            | 769               | 774                                            | 706               |
| Bath delayed by at least 2 days (%)                                                    | 758                            | 743               | 781                                            | 719               |
| Skin-to-skin care (%)                                                                  | 790                            | 769               | 809                                            | 743               |
| Immediate breastfeeding (within 1 hour of delivery) (%)                                | 790                            | 769               | 809                                            | 744               |
| <b>Exclusive Breastfeeding</b>                                                         |                                |                   |                                                |                   |
| Exclusive breastfeeding in past 24 hours, among infants <6 months old (%) <sup>d</sup> | 273                            | 309               | 259                                            | 248               |
| Exclusive breastfeeding for first 6 months, among infants ≥6 months old (%)            | 417                            | 399               | 486                                            | 433               |
| <b>Complementary feeding, among infants ≥6 months old</b>                              |                                |                   |                                                |                   |
| Any home visit related to complementary feeding (%)                                    | 401                            | 386               | 490                                            | 437               |
| Eats solid or semisolid food (%)                                                       | 417                            | 399               | 490                                            | 437               |
| Began eating solid food by age 6 months (%)                                            | 417                            | 399               | 490                                            | 437               |
| Fed solid/semisolid food in previous day (%)                                           | 415                            | 397               | 488                                            | 433               |

|                                                                                     |     |     |     |     |
|-------------------------------------------------------------------------------------|-----|-----|-----|-----|
| Appropriate frequency of cereal-based feedings (%) <sup>e</sup>                     | 417 | 399 | 490 | 437 |
| <b>Immunizations, among infants ≥6 months old</b>                                   |     |     |     |     |
| Received DPT3 (%)                                                                   | 416 | 394 | 490 | 437 |
| Fully immunized (except measles) (%)                                                | 416 | 394 | 490 | 437 |
| <b>Family Planning and Reproductive Health</b>                                      |     |     |     |     |
| Any home visit about family planning or postpartum health (%) <sup>f</sup>          | 787 | 768 | 809 | 744 |
| Current use of temporary methods of contraception (child age ≥6mo) (%) <sup>g</sup> | 408 | 392 | 476 | 423 |
| Current use of any modern method of contraception (%) <sup>h</sup>                  | 773 | 754 | 788 | 712 |

## **Statistical Appendix**

### **“Use of Mobile Technology by Frontline Health Workers to Promote Reproductive, Maternal, Newborn and Child Health and Nutrition: A Cluster Randomized Controlled Trial in Bihar, India”**

Appendix prepared by Stanford Ananya Study Data team

#### Table 1.

Demographics characteristics of FLWs (ANMs, ASHAs and AWWs) as well as maternal respondents were compared for all sampled respondents in the ICT-CCS trial according to the baseline and post-implementation groups. Percentages were reported as crude percentages without adjusting for any survey design or weights. P values were calculated using two-sample t-test for the continuous variables and chi-square test for the categorical variables. If the sociodemographic characteristic represented in rows did not fit the normality assumption (was invalidated), median and inter-quantile range (IQR) was reported instead of mean and standard deviation and Mann-Whitney U-Test was performed. Fisher’s-exact test was conducted for categorical variables with cellular frequency of less than 5 in any sub-group.

#### Table 2.

This table reported training and usage characteristics reported by FLWs overall and separately for the two cadres – AWWs and ASHAs. As these questions were only available post-intervention, we simply reported percentages and no further statistical comparisons were made. Percentages were reported as crude percentages without adjusting for any survey design or weights. Analyses were conducted in STATA version 14.

#### Table 3.

Differences in coordination, job confidence and supervision reported by AWWs and ASHAs from control versus intervention villages after implementation (July-August, 2014) of the ICT-CCS intervention in Saharsa, Bihar.

For all the indicators related to coordination between cadres, job confidence and supervision in this table, we set up our survey design using village as the primary sampling unit, and subcenter as stratum with sampling weights at the FLW level. Our analytical cohort in this table was responses from the survey data for the AWWs and ASHAs at the end of the trial. To compare the difference of the responses between intervention and control groups for both AWWs and ASHAs, survey logistic regressions were performed to obtain the p-value for the difference comparing the intervention vs the control without adjusting for any participant-level covariates. For each binary indicator, we also fit a separate survey logistic regression with all our AWW and ASHA participants to get the p-value of the difference in difference estimator (DID, interaction between FLW type and treatment group) without adjusting for any participant-level covariates. Specifically, the independent variables in the logistic regression for DID included treatment group, FLW group and the interaction term of the two. The dependent variable was our binary indicator of interest. To calculate percent difference between ASHA &

AWW in terms of the treatment effects, we predicted the probability of the indicator via our regression and computed the DID in probabilities of the indicator between the treatment and control group between ASHAs and AWWs. For discrete counts such as ‘Number of home visits conducted jointly with opposite-cadre FLW, in the past 7 days’, survey linear regressions were conducted treating outcome indicators as continuous variables instead, using the same survey design set-up as survey logistic regressions. In addition, we reported average difference in visits/times between ASHAs & AWWs directly from the coefficient in the interaction term in survey linear regression. All analyses were conducted by using the Survey procedures in Analyses and were conducted in SAS version 9.4 (Surveyreg surveylogistic) and STATA version 14 (svyreg svylogit).

#### Table 4.

Differences attributable to the ICT-CCS intervention on selected indicators reported by maternal household respondents as part of the ICT-CCS intervention trial in Saharsa, Bihar 2012-2014

To evaluate the impact of the ICT-CCS intervention on selected maternal and child health indicators, we utilized survey sampling weights according to this survey’s design. Village was the primary sampling unit, sub-center was the stratum and sample weights were calculated at the household level. Our analytical cohort in this table was responses from the survey data for all maternal respondents pre- and post-implementation of the trial. Rates of occurrence of all our binary indicators were reported by the intervention groups (intervention vs control) using survey commands in SAS/STATA to account for the survey design. To compare the difference of the responses between intervention and control group, survey logistic regressions or survey linear regression were performed to get the p-value for the difference in indicator comparing the treatment vs the control adjusting for selected maternal respondents’ demographics variables. This approach was conducted separately for the pre-intervention period only, post-implementation period only and then the last set included a difference in difference estimator (DID, interaction between intervention group and time) including data from both the pre- and post-implementation periods simultaneously. In the last set, the DID was calculated. All models were calculated adjusting for selected maternal respondents’ demographics variables. Models were calculated using the Survey procedures in Analyses were conducted in SAS version 9.4 (Surveyreg surveylogistic) and STATA version 14 (svyreg svylogit).

#### Reference:

1. Kish KL "Survey Sampling" : Kish, Leslie (1995) Survey Sampling, Wiley, ISBN 0-471-10949-5
2. SAS. Survey procedures: Lewis, Taylor H. Complex Survey Data Analysis with SAS. CRC Press, 2016.
3. Survey Data Manual: A Stata Press Publication (2017), ISBN13: 978-1-59718-252-2

## Appendix. List of Variables for reproducibility

Table 1. Demographic characteristics of Anganwadi Workers (AWW), Accredited Social Health Activists (ASHA), and maternal household respondents as part of the ICT-CCS intervention trial in Saharsa, Bihar, 2012-2014. <sup>a</sup>

| Original Variable                                                | Any Modification (R Codes)                                                                                                                  | Description                                                                                                                        |
|------------------------------------------------------------------|---------------------------------------------------------------------------------------------------------------------------------------------|------------------------------------------------------------------------------------------------------------------------------------|
| endline                                                          |                                                                                                                                             | Endline (Y/N)<br>0: Baseline<br>1: Endline (Post-implementation in table)                                                          |
| Treatment                                                        |                                                                                                                                             | Treatment group (y/n)                                                                                                              |
| ASHA or AWW (ASHA_AWW ICT_RUF.DTA)                               |                                                                                                                                             |                                                                                                                                    |
| asha or aww                                                      |                                                                                                                                             | Asha (y/n)<br>0: AWW<br>1: ASHA<br>Or AWW(Y/N)<br>0:ASHA<br>1:AWW                                                                  |
| t0_a1 and t1_a01                                                 |                                                                                                                                             | Live in the village that provided service (y/n)                                                                                    |
| t0_A6 and t1_A06                                                 |                                                                                                                                             | - Age (continuous)                                                                                                                 |
| t0_a7 and t1_a07                                                 |                                                                                                                                             | - Hindu (y/n)                                                                                                                      |
| t0_a9 and t1_a9                                                  | T0_a7= <b>1</b> and t0_a9 for endline=0<br>T1_a7= <b>1</b> and t1_a9 for endline=1                                                          | Caste (for Hindu Only)<br>- Scheduled caste<br>- -Scheduled tribe<br>- Other backward class<br>- General Class<br>- Other(Specify) |
| t0_a12 and t1_a13                                                |                                                                                                                                             | Highest grade of education (Continuous)                                                                                            |
| Maternal Respondents (file:ICT_RCT_HH_RUF.DTA)                   |                                                                                                                                             |                                                                                                                                    |
| t0_hh_hindu and t1_hh_hindu                                      |                                                                                                                                             | Hindu (y/n)                                                                                                                        |
| t0_hh_scst and t1_hh_scst                                        |                                                                                                                                             | Caste (for Hindu Only)<br>- Scheduled caste<br>- -Scheduled tribe<br>- Other backward class<br>- General Class<br>Other(Specify)   |
| t0_b02 and t1_hh_sizehh                                          |                                                                                                                                             | Household Size                                                                                                                     |
| t0_hh_agefml_cat_rk from t0_hh_agefml<br>and<br>t1_hh_agefml_cat | t0_hh_agefml_cat_rk=.;<br>if 14<t0_hh_agefml<20 then<br>t0_hh_agefml_cat_rk=1;<br>else if 19<t0_hh_agefml<25 then<br>t0_hh_agefml_cat_rk=2; | Age category                                                                                                                       |

|                                                                     |                                                                                                                                                                                                                                               |                                                             |
|---------------------------------------------------------------------|-----------------------------------------------------------------------------------------------------------------------------------------------------------------------------------------------------------------------------------------------|-------------------------------------------------------------|
|                                                                     | <pre> else if 24&lt;t0_hh_agefml&lt;30 then t0_hh_agefml_cat_rk=3; else if 29&lt;t0_hh_agefml&lt;35 then t0_hh_agefml_cat_rk=4; else if 34&lt;t0_hh_agefml&lt;50 then t0_hh_agefml_cat_rk=5; </pre>                                           |                                                             |
| t0_hh_agefml                                                        |                                                                                                                                                                                                                                               | Age                                                         |
| t0_hh_numkid_cat_rk from<br>t0_hh_numkid<br>and<br>t1_hh_numkid_cat | <pre> t0_hh_numkid_cat_rk=.; if t0_hh_numkid=1 then t0_hh_numkid_cat_rk=1; else if t0_hh_numkid=2 then t0_hh_numkid_cat_rk=2; else if t0_hh_numkid=3 then t0_hh_numkid_cat_rk=3; else if t0_hh_numkid&gt;3 then t0_hh_numkid_cat_rk=4; </pre> | Birth Parity                                                |
| t0_hh_educ and t1_hh_educ                                           |                                                                                                                                                                                                                                               | Ever Attended school (0/1)                                  |
| t0_hh_literate and<br>t1_hh_literate                                |                                                                                                                                                                                                                                               | Literate (0/1)                                              |
| t0_hh_bpl and t1_hh_bpl                                             |                                                                                                                                                                                                                                               | Below poverty line (0/1)                                    |
| t0_hh_wealthindex_qurt and<br>t1_hh_wealthindex_qurt                |                                                                                                                                                                                                                                               | Socio-economic status<br>(Quartile of<br>t0_hh_wealthindex) |

Table 2: ICT-CCS training and usage characteristics reported by front-line workers (FLW) overall and separately for the two cadres – Anganwadi Workers (AWW) and Accredited Social Health Activists (ASHA) – as part of the post-implementation assessment of the ICT-CCS intervention trial in Saharsa, Bihar, 2012-2014.

| Original Variable  | Any Modification (R Codes) | Description                                                                                    |
|--------------------|----------------------------|------------------------------------------------------------------------------------------------|
| eFlw_phn_trng      |                            | Received training on use of ICT-CCS phone from staff who came to village                       |
| eFlw_phn_used_past |                            | Used phone before given ICT-CCS phone                                                          |
| t1_d18             |                            | How FLW decides which households to visit herself and which to ask opposite-cadre FLW to visit |
| t1_d07             |                            | Share of time phone is charged and working                                                     |
|                    |                            |                                                                                                |
| eFlw_phn_damage    |                            | ICT-CCS phone has broken                                                                       |

|          |  |                                                       |
|----------|--|-------------------------------------------------------|
| t1_d08_1 |  | ICT-CCS phone had been lost                           |
| t1_d12_1 |  | Problems faced while using ICT-CCS phone              |
| t1_d39_1 |  | Videos shown most often on ICT-CCS phone              |
| t1_d36_1 |  | Forms used most often other than home visit scheduler |

Table 3. Differences in coordination, job confidence and supervision reported by Anganwadi Workers (AWW) and Accredited Social Health Activists (ASHA) from control versus intervention villages after implementation (July-August, 2014) of the ICT-CCS intervention in Saharsa, Bihar.

| Original Variable                                                                                                                                                             | Any Modification (R Codes)                                                                                                    | Description                                                                                                    |
|-------------------------------------------------------------------------------------------------------------------------------------------------------------------------------|-------------------------------------------------------------------------------------------------------------------------------|----------------------------------------------------------------------------------------------------------------|
| t1_c77 = how many times in the past 30 days have you asked the aww to cover a home ...<br>t1_c76= have you ever asked the aww to help you by conducting a home visit when you | if t1_c77>0 then askedhelpin30=1;<br>else if t1_c77=0 then askedhelpin30=0;<br>else if t1_c76=0 then askedhelpin30=0;         | Have you ever asked an opposite cadre FLW to conduct a home visit if you were unable to (in last 30 days?) (%) |
| t1_c78 has the aww ever asked you to help her by conducting a home visit when she ..<br>t1_c79 = how many times in the past 30 days has the aww asked you to cover a home..   | if t1_c79>0 then flwaskedhelpin30=1;<br>else if t1_c79=0 then flwaskedhelpin30=0;<br>else if t1_c78=0 then flwaskedhelpin30=0 | Has opposite cadre FLW ever asked you to conduct a home visit if they were unable to (in the last 30 days) (%) |
| t1_c83 in the past 7 days did you do any home visits jointly with the aww? ...                                                                                                | .                                                                                                                             | Number of home visits conducted jointly with opposite-cadre FLW in the past 7 days (mean)                      |
| t1_c80 =how many times did you meet with the aww in the past 7 days to talk about ..                                                                                          | if t1_c80>0 then talkabtwrk=1;<br>else if t1_c80=0 then talkabtwrk=0;                                                         | Met with opposite-cadre FLW to talk about work or home visits in the past 7 days (%)                           |
| t1_e15                                                                                                                                                                        | .                                                                                                                             | Feels she has all skills needed for job                                                                        |
| .                                                                                                                                                                             | .                                                                                                                             | FLW feels she needs skills related to:                                                                         |
| t1_e16_code1                                                                                                                                                                  | .                                                                                                                             | How to plan home visits                                                                                        |
| t1_e16_code2                                                                                                                                                                  | .                                                                                                                             | How to maintain registers                                                                                      |

|                                                                                     |   |                                                                                        |
|-------------------------------------------------------------------------------------|---|----------------------------------------------------------------------------------------|
| t1_e16_code3                                                                        | . | Maternal and newborn health issues                                                     |
| t1_e16_code4                                                                        | . | How to communicate better with mothers and families                                    |
| T1_e2 in the last 3 calendar months, did you meet your [supervisor] not counting... | . | Met with supervisor in past 3 months outside sub-center meeting (%)                    |
| T1_e04: how many times did you meet your [supervisor] in the last 3 calendar months | . | Number of times met with supervisor in past 3 months outside sub-center meeting (mean) |
| .                                                                                   | . | Supervisor available by phone or in person when FLW needs to reach her (%):            |
| e1fw_sup_alwaysavail                                                                | . | Always                                                                                 |
| e1fw_sup_someavail                                                                  | . | Sometimes                                                                              |
| e1fw_sup_neveravail                                                                 | . | Never                                                                                  |
| .                                                                                   | . | During recent visits, supervisor, most of the time:                                    |
| e1fw_outst_vis                                                                      | . | Brought outstanding visits to the FLW's attention (%)                                  |
| e1fw_info_hh                                                                        | . | Gave the FLW guidance on what information to give to households (%)                    |
| e1fw_comm_hh                                                                        | . | Gave the FLW guidance on how to communicate effectively with households (%)            |
| e1fw_conv_hh                                                                        | . | Talked to the households the FLW was finding difficult to convince (%)                 |
| e1fw_coord                                                                          | . | Helped FLW coordinate with her counterpart (%)                                         |

Table 4. Differences attributable to the ICT-CCS intervention on selected indicators reported by maternal household respondents as part of the ICT-CCS intervention trial in Saharsa, Bihar 2012-2014.

| Original Variable          | Any Modification (R Codes)                                         | Description                                  |
|----------------------------|--------------------------------------------------------------------|----------------------------------------------|
| Modeled outcome            |                                                                    |                                              |
| anc_atleast3visits         | max(t0_hh_anc_atleast3visits,t1_hh_anc_atleast3visits)             | At least 3 antenatal home visits             |
| flw_visit_tot_3trim_atl2   | max(t0_hh_flw_visit_tot_3trim_atl2,t1_hh_flw_visit_tot_3trim_atl2) | 2 or more home visits in last trimester      |
| anc_tt_atleast2inj         | max(t0_hh_anc_tt_atleast2inj,t1_hh_anc_tt_atleast2inj)             | At least 2 tetanus toxoid injections         |
| anc_ifa_atl90con           | max(t0_hh_anc_ifa_atl90con,t1_hh_anc_ifa_atl90con)                 | Consumed at least 90 iron-folic acid tablets |
| anc_ifa_atl90rec           | max(t0_hh_anc_ifa_atl90rec,t1_hh_anc_ifa_atl90rec)                 | Received iron-folic acid tablets by month 4  |
| t1_hh_flw_visit_first 24   | .                                                                  | Visit in first 24 Hours                      |
| t1_hh_flw_visit_first week | .                                                                  | Any visit in the first week                  |



|                                      |                                                                |                                                                         |
|--------------------------------------|----------------------------------------------------------------|-------------------------------------------------------------------------|
| t1_hh_flw_visit_1st<br>month_not1stw | .                                                              | Any visit after first week but before first month                       |
| t1_hh_flw_visit_tot1<br>stmnth       | .                                                              | Total number of home visits in the first month (mean)                   |
| dppc_fac_del                         | max(t0_hh_dppc_fac_del,t1_hh_dppc_fac_del)                     | Facility delivery                                                       |
| dppc_nothingapplied                  | max(t0_hh_dppc_nothingapplied,t1_hh_dppc_nothingapplied)       | Nothing applied to the umbilical cord                                   |
| dppc_bathdelayedatl2                 | max(t0_hh_dppc_bathdelayedatl2,t1_hh_dppc_bathdelayedatl2)     | Bath delayed by at least 2 days                                         |
| dppc_skintoskin                      | max(t0_hh_dppc_skintoskin,t1_hh_dppc_skintoskin)               | Skin-to-skin care                                                       |
| dppc_imnbrfeed                       | max(t0_hh_dppc_imnbrfeed,t1_hh_dppc_imnbrfeed)                 | Immediate breastfeeding (within 1 hour of delivery)                     |
| dppc_excbrfeedpast24                 | max(t0_hh_dppc_excbrfeedpast24,t1_hh_dppc_excbrfeedpast24)     | Exclusive breastfeeding in past 24 hours, among infants <6 months old   |
| dppc_excbrfeed6mth                   | max(t0_hh_dppc_excbrfeed6mth,t1_hh_dppc_excbrfeed6mth)         | Exclusive breastfeeding for first 6 months, among infants ≥6 months old |
| flw_visit_compfeed                   | max(t0_hh_flw_visit_compfeed,t1_hh_flw_visit_compfeed)         | Any home visit related to complementary feeding                         |
| feed_eat_solidsemis                  | max(t0_hh_feed_eat_solidsemis,t1_hh_feed_eat_solidsemis)       | Eats solid or semisolid food                                            |
| feed_solid_by6mth                    | max(t0_hh_feed_solid_by6mth,t1_hh_feed_solid_by6mth)           | Began eating solid food by age 6 months                                 |
| feed_anycereal_prevday               | max(t0_hh_feed_anycereal_prevday,t1_hh_feed_anycereal_prevday) | Fed solid/semisolid food in previous day                                |
| feed_approp_frq                      | max(t0_hh_feed_approp_frq,t1_hh_feed_approp_frq)               | Appropriate frequency of cereal-based feedings c                        |
| imm_dpt3by6_card                     | max(t0_hh_imm_dpt3by6_card,t1_hh_imm_dpt3by6_card)             | Received DPT3                                                           |
| imm_fullimm_card                     | max(t0_hh_imm_fullimm_card,t1_hh_imm_fullimm_card)             | Fully immunized (except measles)                                        |
| flw_visit_flyplan                    | max(t0_hh_flw_visit_flyplan,t1_hh_flw_visit_flyplan)           | Any home visit about family planning or postpartum health d             |
| fp_contr_temp_r                      | max(t0_hh_fp_contr_temp_r,t1_hh_fp_contr_temp_r)               | Current use of temporary methods of contraception (child age >6mo) e    |
| fp_contr_anymodern_r                 | max(t0_hh_fp_contr_anymodern_r,t1_hh_fp_contr_anymodern_r)     | Current use of any modern method of contraception f                     |
| Covariates                           |                                                                |                                                                         |
| hh_agefml                            | max(t0_hh_agefml,t1_hh_agefml);                                | Age                                                                     |
| hh_scst                              | max(t0_hh_scst,t1_hh_scst);                                    | SCST category                                                           |
| hh_literate                          | max(t0_hh_literate,t1_hh_literate);                            | literate                                                                |
| hh_educ                              | max(t0_hh_educ,t1_hh_educ);                                    | education                                                               |
| hh_wealthindex                       | max(t0_hh_wealthindex,t1_hh_wealthindex);                      | wealth index                                                            |
| hh_sizehh                            | max(t0_b02,t1_b02);                                            | household size                                                          |
| hh_bpl                               | max(t0_hh_bpl,t1_hh_bpl);                                      | below poverty line                                                      |

|        |                                                                                                                                                                                                                                      |          |
|--------|--------------------------------------------------------------------------------------------------------------------------------------------------------------------------------------------------------------------------------------|----------|
| hh_rel | if t0_hh_hindu=0 then t0_hh_rel=2;else<br>t0_hh_rel=t0_hh_scst;<br>if t1_hh_hindu=0 then t1_hh_rel=2;else<br>t1_hh_rel=t1_hh_scst;<br>hh_hindu=max(t0_hh_hindu,t1_hh_hindu);<br>if hh_hindu=0 then hh_rel=2; else<br>hh_rel=hh_scst; | religion |
|--------|--------------------------------------------------------------------------------------------------------------------------------------------------------------------------------------------------------------------------------------|----------|
